# Supplementary material
Source: HighWire-hosted journal article supplement (https://bmjopen.bmj.com/content/10/11/e040962)
Supplement: inline-supplementary-material-2 [file inline-supplementary-material-2.pdf]

## Supplementary File 2: PubMed search strings

### *Combination different terms with each other*

(Return to work OR Work, Return to OR Back-to-Work OR Return-to-Work OR Back to Work OR RTW OR Chronic pain Intervention OR Vocational rehabilitation OR Rehabilitation OR Work OR Work rehabilitation OR Job program) AND (Chronic pain OR Chronic Musculoskeletal Pain OR Widespread Chronic Pain) AND (randomized controlled trial[pt] OR controlled clinical trial[pt] OR randomized[tiab] OR placebo[tiab] OR clinical trials as topic[mesh:noexp] OR randomly[tiab] OR trial[ti]) AND "humans"[MeSHTerms]

### *search strings*

((("return to work"[MeSHTerms] OR ("return"[All Fields] AND "work"[All Fields]) OR "return to work"[All Fields]) OR ("return to work"[MeSHTerms] OR ("return"[All Fields] AND "work"[All Fields]) OR "return to work"[All Fields] OR ("work"[All Fields] AND "return"[All Fields])) OR ("return to work"[MeSHTerms] OR ("return"[All Fields] AND "work"[All Fields]) OR "return to work"[All Fields] OR ("back"[All Fields] AND "work"[All Fields]) OR "back to work"[All Fields]) OR ("return to work"[MeSH Terms] OR ("return"[All Fields] AND "work"[All Fields]) OR "return to work"[All Fields]) OR ("return to work"[MeSHTerms] OR ("return"[All Fields] AND "work"[All Fields]) OR "return to work"[All Fields] OR ("back"[All Fields] AND "work"[All Fields]) OR "back to work"[All Fields]) OR RTW[All Fields] OR ("chronic pain"[MeSHTerms] OR ("chronic"[All Fields] AND "pain"[All Fields]) OR "chronic pain"[All Fields]) AND ("methods"[MeSHTerms] OR "methods"[All Fields] OR "intervention"[All Fields])) OR ("rehabilitation, vocational"[MeSH Terms] OR ("rehabilitation"[All Fields] AND "vocational"[All Fields]) OR "vocational rehabilitation"[All Fields] OR ("vocational"[All Fields] AND "rehabilitation"[All Fields])) OR ("rehabilitation"[Subheading] OR "rehabilitation"[All Fields] OR "rehabilitation"[MeSH Terms]) OR ("work"[MeSH Terms] OR "work"[All Fields]) OR (("work"[MeSHTerms] OR "work"[All Fields]) AND ("rehabilitation"[Subheading] OR "rehabilitation"[All Fields] OR "rehabilitation"[MeSH Terms])) OR (Job[All Fields] AND program[All Fields])) AND (("chronic pain"[MeSHTerms] OR ("chronic"[All Fields] AND "pain"[All Fields]) OR "chronic pain"[All Fields]) OR (Chronic[All Fields] AND ("musculoskeletal pain"[MeSH Terms] OR ("musculoskeletal"[All Fields] AND "pain"[All Fields]) OR "musculoskeletal pain"[All Fields]) AND ("chronic pain"[MeSH Terms] OR ("chronic"[All Fields] AND "pain"[All Fields]) OR "chronic pain"[All Fields] OR ("widespread"[All Fields] AND "chronic"[All Fields] AND "pain"[All Fields]) OR "widespread chronic pain"[All Fields])))) AND (randomized controlled trial[pt] OR controlled clinical trial[pt] OR randomized[tiab] OR placebo[tiab] OR "clinical trials as topic"[MeSH Terms:noexp] OR randomly[tiab] OR trial[ti]) AND "humans"[MeSHTerms]

45

46
